# Supplementary material for: Exploiting regulatory heterogeneity to systematically identify enhancers with high accuracy
Source: PubMed Central journal article supplement — Proc Natl Acad Sci U S A. 2018 Dec 31;116(3):900–8. doi: 10.1073/pnas.1808833115 (PMC6338827; doi:10.1073/pnas.1808833115), 2018-12-31
Supplement: pnas.1808833115.sapp.pdf [file pnas.1808833115.sapp.pdf]

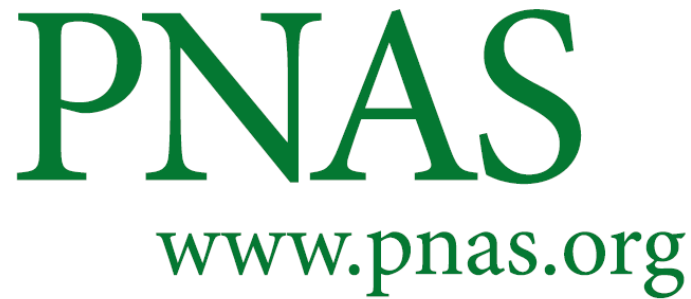

Supplementary Information for

**Exploiting regulatory heterogeneity to systematically identify enhancers  
with high accuracy**

Hamutal Arbel<sup>a,b</sup>, Sumanta Basu<sup>a,b,e</sup>, William W. Fisher<sup>c</sup>, Ann S. Hammonds<sup>c</sup>, Kenneth H. Wan<sup>c</sup>, Soo Park<sup>c</sup>, Richard Weizmann<sup>c</sup>, Soile Keranen<sup>c</sup>, Clara Henriquez<sup>c</sup>, Omid Shams Solari<sup>b</sup>, Peter Bickel<sup>1,b,\*</sup>, Mark D. Biggin<sup>c</sup>, Susan E. Celniker<sup>1,a,\*</sup> and James B. Brown<sup>1,a,b,d,\*</sup>

<sup>a</sup>*Molecular Ecosystems Biology Department, Division of Environmental Genomics and Systems Biology, Lawrence Berkeley National Laboratory, Berkeley, CA, USA, 94720*

<sup>b</sup>*Department of Statistics, University of California, Berkeley, CA, USA, 94720*

<sup>c</sup>*Biological Systems and Engineering Division, Lawrence Berkeley National Laboratory, Berkeley, CA, USA, 94720*

<sup>d</sup>*Centre for Computational Biology, University of Birmingham, Edgbaston, Birmingham, B15 2TT, UK*

<sup>e</sup>*Department of Biological Statistics and Computational Biology, Cornell University, Ithaca, NY, USA, 14850*

<sup>1</sup>To whom correspondence may be addressed. E-mail: [JBBrown@lbl.gov](mailto:JBBrown@lbl.gov), [SECelniker@lbl.gov](mailto:SECelniker@lbl.gov), [bickel@stat.berkeley.edu](mailto:bickel@stat.berkeley.edu)

\*Co-senior authors

Short title: Accurate prediction of enhancers

**This PDF file includes:**

Figs. S1 to S6 and associated figure legends

Tables S1 to S3 and associated titles and descriptions

**Other supplementary materials for this manuscript include the following:**

Dataset S1

Dataset S2

**Fig. S1. Roc curves – all active enhancers versus non-enhancers**

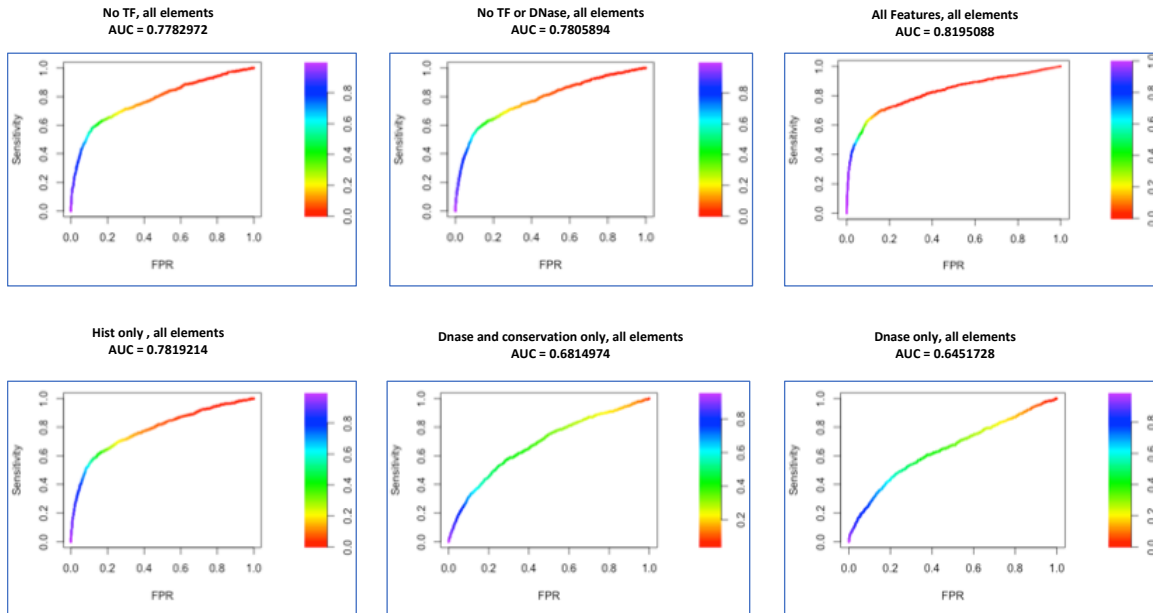

**Figure S1: (a)** Precision-Recall curves of the three analyses (Random Forest, naïve Bayes, logistic regression) for all elements, class I elements or class II elements. Elements that do not exhibit enhancer activity at stage 5, yet were found to act as enhancers at later stages, are excluded from the analyses. Random Forest PR curve for the data set (dashed blue) shows mediocre performance, with area under the curve (AUC) of 0.72. Predicting class I enhancers, the predictive power rises sharply, AUC = 0.95, while prediction of class II enhancers is close to random guess, with AUC = 0.22. PR curves for logistic regressions almost overlap those of RF, with AUC for all, class I and class II of 0.72, 0.94 and 0.24 respectively. Naïve Bayes performance is poorer, with AUC for all, class I and class II of 0.63, 0.8 and 0.2 respectively.

**Fig. S2. Comparison of Machine Learning Methods**

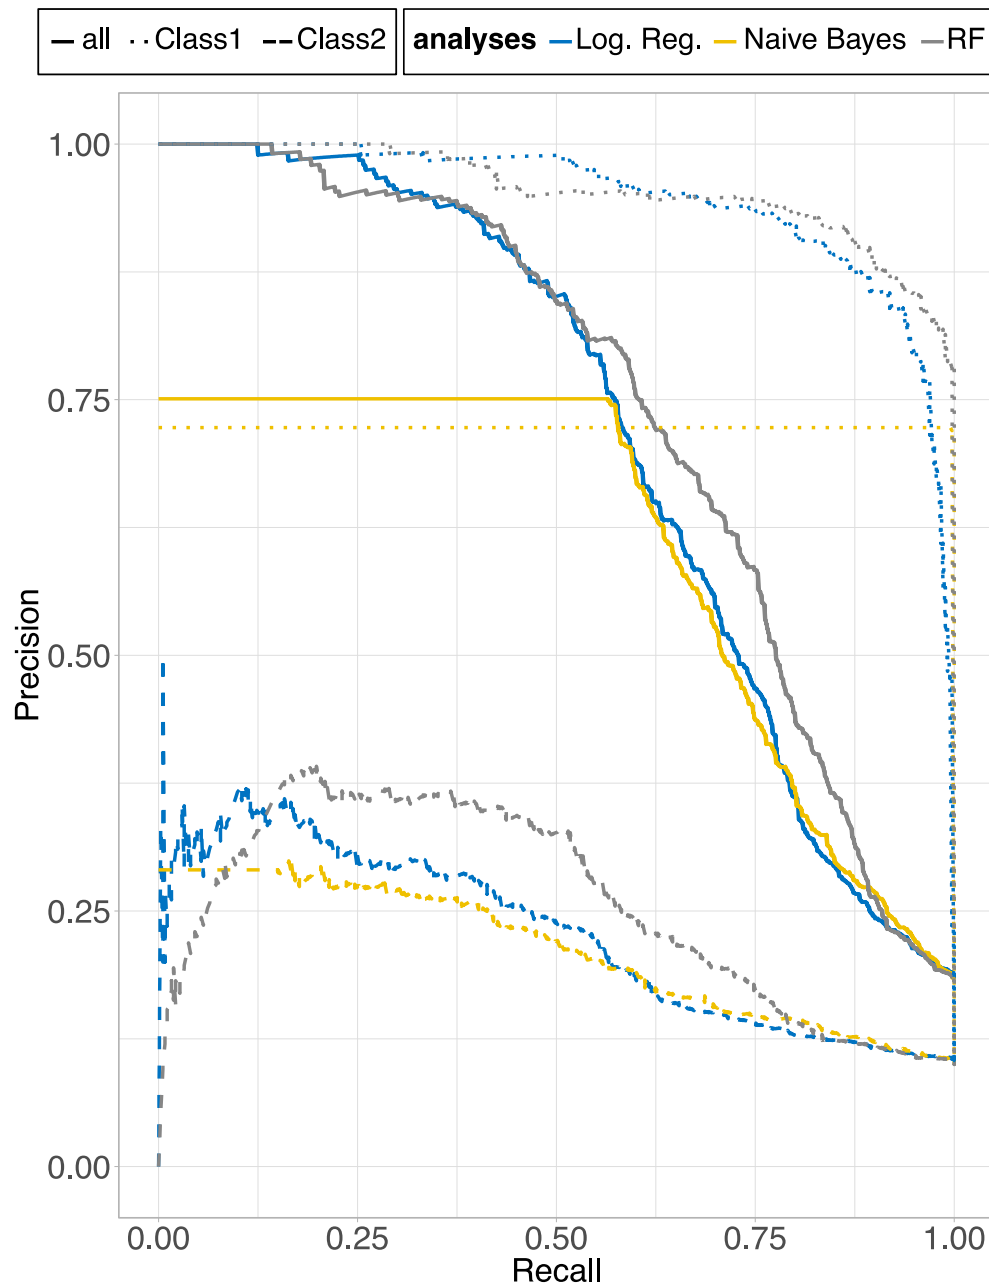

**Figure S2:** Box plots showing the distribution of features in non-enhancers, class I enhancers and class II enhancers. Sequence specific transcription factors (**a and zld** in **c**) show the clearest separation of class I from the other enhancers, though a few histone marks (**b**), particularly H3K4me1, also separates class I cleanly. Notably, no feature cleanly separates class II enhancers from non-enhancers. There is no appreciable separation in any of the conservation scores between enhancers and non-enhancers (**c, left**). DNase accessibility, distance to bidirectional RNA, distance to PolII 2 or distance to transcription start site (**d**) separation between class I and class II enhancers, reinforcing our observation that the data is highly redundant.

Fig. S3. Histograms for SDE and non-SDE enhancers.

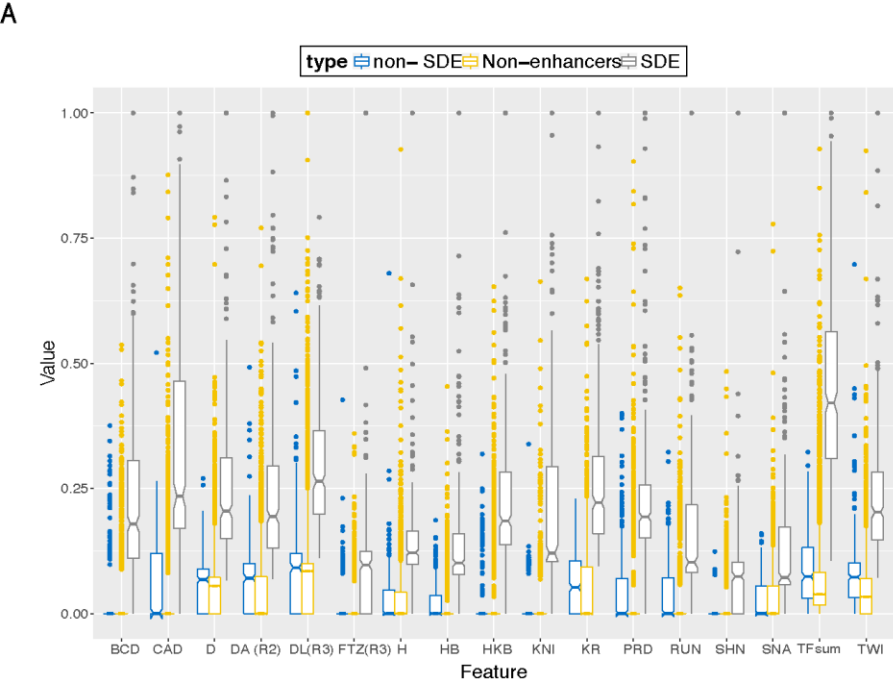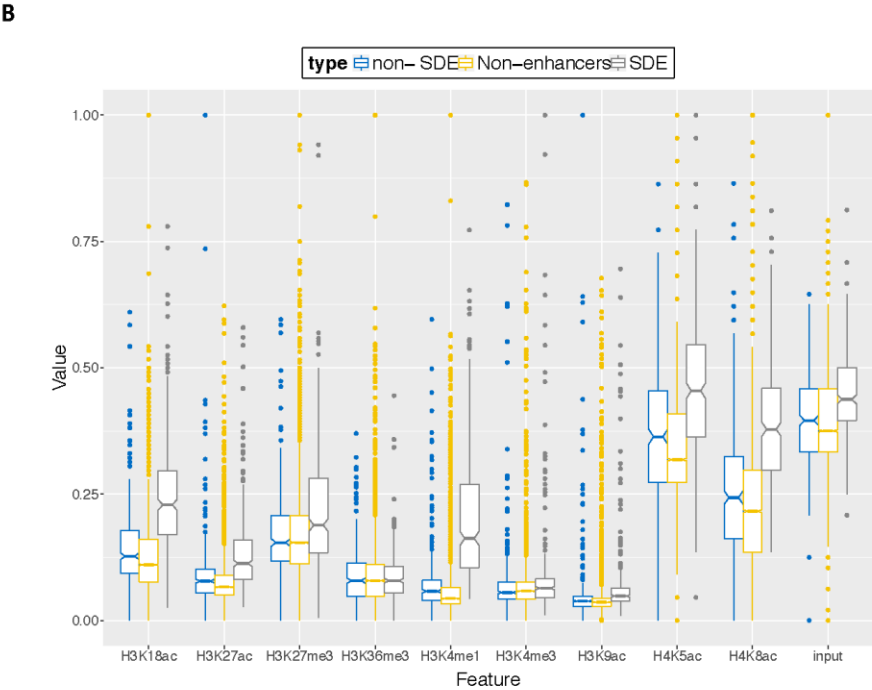

C

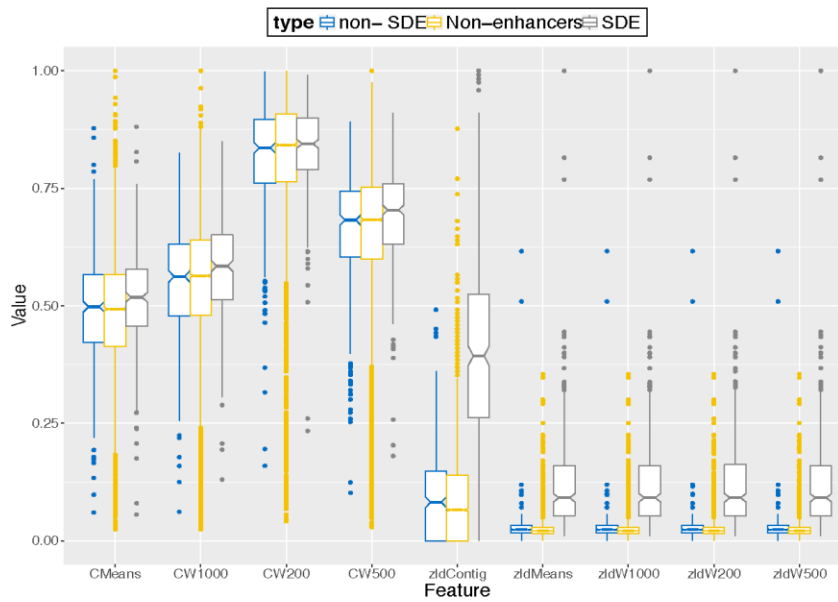

D

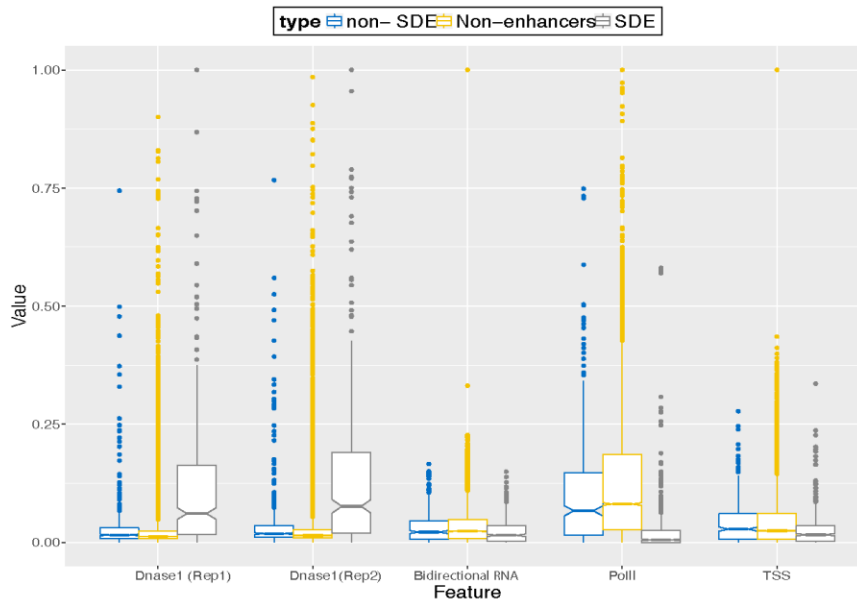

**Figure S3:** Histogram of expression area for SDE and non-SDE (Class I and Class II enhancers, respectively). (A) Transcription factors and related features; (B) Chromatin marks and ChIP Input (control); (C) Zelda ChIP-seq and controls; (D) DNase-seq, CAGE data defining bi-directional promoters, Pol II ChIP-seq data, and CAGE TSS quantifications (including unidirectional transcription start sites).

**Fig. S4. Embryonic whole mount *in situ* RNA hybridization validation experiments.**

| CRM      | Lateral                                                                             | Predicted Regulated Gene | WT gene expression                                                                   |
|----------|-------------------------------------------------------------------------------------|--------------------------|--------------------------------------------------------------------------------------|
| CEP01101 |    | <i>salr</i>              |    |
| CEP01102 |    | <i>N/D</i>               |                                                                                      |
| CEP01103 |    | <i>beat-IIIc</i>         |    |
| CEP01104 |    | <i>dnt</i>               |    |
| CEP01105 |    | <i>toc</i>               |    |
| CEP01107 |   | <i>N/D</i>               |                                                                                      |
| CEP01109 |  | <i>N/D</i>               |                                                                                      |
| CEP01110 |  | <i>N/D</i>               |                                                                                      |
| CEP01111 |  | <i>N/A</i>               |                                                                                      |
| CEP01113 |  | <i>I8w</i>               |  |
| CEP01116 |  | <i>N/A</i>               |                                                                                      |
| CEP01117 |  | <i>trn</i>               |  |
| CEP01118 |  | <i>N/D</i>               |                                                                                      |
| CEP01119 |  | <i>comm2</i>             |  |
| CEP01120 |  | <i>comm2</i>             |  |
| CEP01121 |  | <i>N/D</i>               |                                                                                      |

|          |                                                                                     |                |                                                                                      |
|----------|-------------------------------------------------------------------------------------|----------------|--------------------------------------------------------------------------------------|
| CEP01123 |    | <i>skd</i>     |    |
| CEP01124 |    | <i>CG45186</i> |    |
| CEP01125 |    | <i>N/D</i>     |                                                                                      |
| CEP01127 |    | <i>klar</i>    |    |
| CEP01130 |    | <i>aay</i>     |    |
| CEP01131 |    | <i>hth</i>     |    |
| CEP01133 |    | <i>Akt1</i>    |    |
| CEP01135 |    | <i>iab-8</i>   |    |
| CEP01136 |   | <i>iab-8</i>   |   |
| CEP01137 |  | <i>mira</i>    |  |
| CEP01139 |  | <i>N/D</i>     |                                                                                      |
| CEP01140 |  | <i>heph</i>    |  |
| CEP01143 |  | <i>Sodh-1</i>  |  |
| CEP01144 |  | <i>N/A</i>     |                                                                                      |
| CEP01148 |  | <i>mew</i>     |  |
| CEP01150 |  | <i>N/D</i>     |                                                                                      |
| CEP01151 |  | <i>N/D</i>     |                                                                                      |

**Fig. S4:** All validation experiments shown along with proximal genes exhibiting similar expression patterns.



**Fig. S5. Feature Importances.**

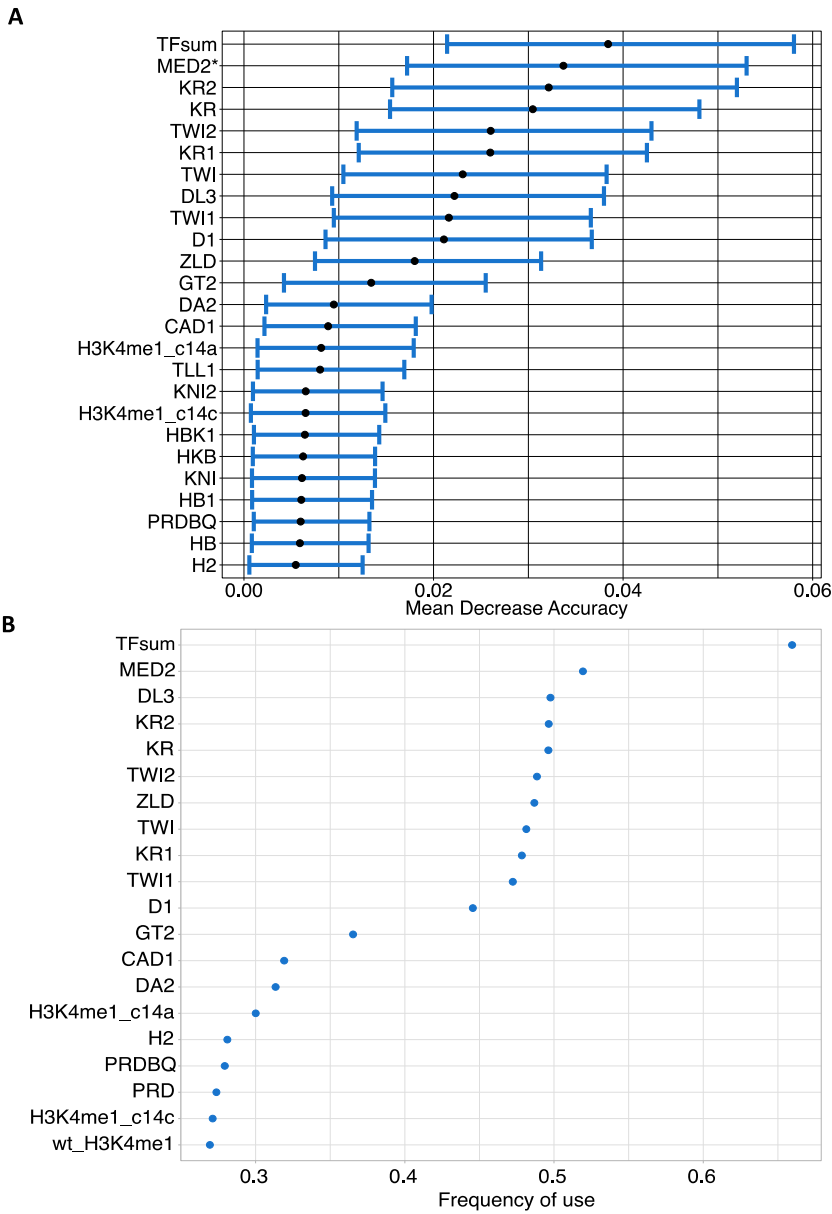

\*Numbers or letters following the TF name refer to the antibody used for the ChIP Experiments by the BDTNP

**Fig. S5: (A)** Feature importance (mean decrease in accuracy upon permutation) is dominated by transcription factors, with the H3K4me1 the only histone mark in the top 25 **(B)** How frequently each of the top 25 features was used by Random Forest in predicting SDE enhancers

**Fig. S6. Correlation between feature importance and genome-wide prevalence**

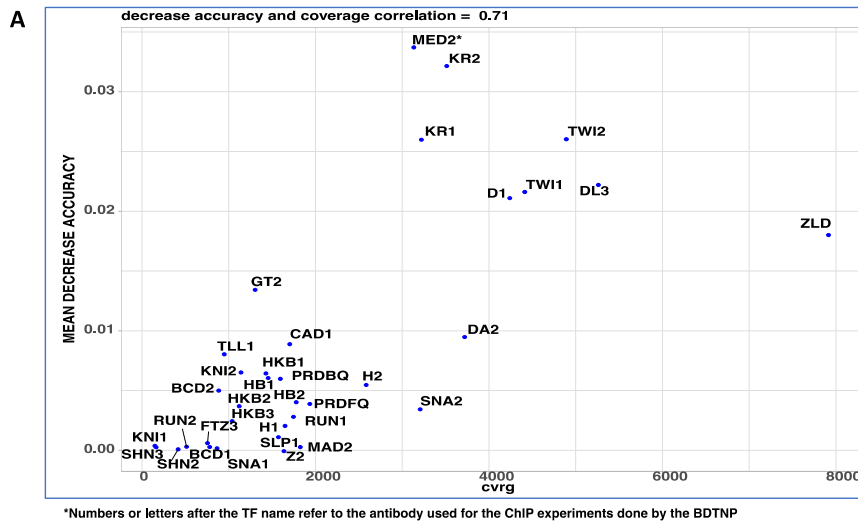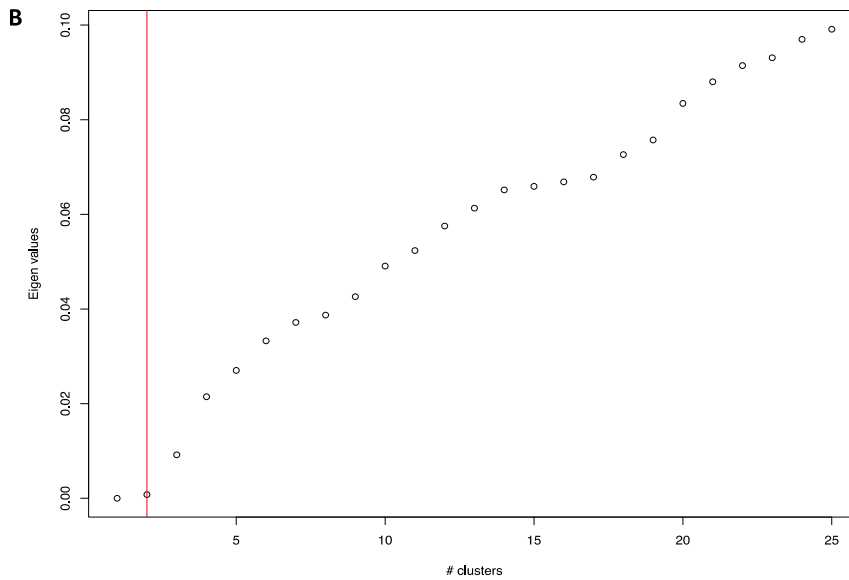

**Figure S6: (A)** Correlation between feature importance of transcription factors as measured by mean decrease accuracy and the number of DNA segments in the training set which contain peaks above the 25% FDR of these transcription factors. There are two clusters of transcription factors: low coverage low importance and high coverage high importance. Though there appears to be no correlation inside the clusters, there is an overall correlation of  $r \sim 0.7$  between importance and coverage. **(B)** The ordered eigenvalues of the affinity matrix (seven nearest neighbors of Euclidian distance based similarity matrix) of the Random Forests local importance matrix. The jump in value after the second eigenvalue indicates a two-cluster structure

**Table S1. All features used in prediction. Transcription factors and DNase number refer to biological replicas**

| Category                                  | Features included                                                                                                                                                                                                                                                                                                                                                                                                                                                                                                              |
|-------------------------------------------|--------------------------------------------------------------------------------------------------------------------------------------------------------------------------------------------------------------------------------------------------------------------------------------------------------------------------------------------------------------------------------------------------------------------------------------------------------------------------------------------------------------------------------|
| <b>Histone and Histone modifications</b>  | H3_c12 H3_c14a H3_c14c H3_c8 H3K18ac_c12 H3K18ac_c14a H3K18ac_c14c H3K18ac_c8 H3K27ac_c12 H3K27ac_c14a H3K27ac_c14c H3K27ac_c8 H3K27me3_c12 H3K27me3_c14a H3K27me3_c14c H3K36me3_c12 H3K36me3_c14a H3K36me3_c14c H3K4me1_c12 H3K4me1_c14a H3K4me1_c14c H3K4me1_c8 H3K4me3_c12 H3K4me3_c14a H3K4me3_c14c H3K4me3_c8 H3K9ac_c12 H3K9ac_c14a H3K9ac_c14c H3K9ac_c8 H4K5ac_c12 H4K5ac_c14a H4K5ac_c14c H4K5ac_c8 H4K8ac_c12 H4K8ac_c14a H4K8ac_c14c H4K8ac_c8 input_c12 input_c14a input_c14c input_c8 wt_H3 wt_H3K18ac wt_H3K4me1 |
| <b>Transcription Factor data</b>          | BCD1 BCD2 CAD1 D1 DA2 DL3 FTZ3 GT2 H1 H2 HB1 HB2 HKB1 HKB2 HKB3 KNI1 KNI2 KR1 KR2 MAD2 MED2 PRDBQ PRDFQ RUN1 RUN2 SHN2 SHN3 SLP1 SNA1 SNA2 TLL1 TWI1 TWI2 Z2 ZLD                                                                                                                                                                                                                                                                                                                                                               |
| <b>Transcription factor combinatorics</b> | Sum of all TF, sum of all duplicates for: BCD TWI SNA SHN RUN KR KNI HKB PRD HB H                                                                                                                                                                                                                                                                                                                                                                                                                                              |
| <b>Conservation scores</b>                | Mean, Max sliding window of:200, 500 and 1000, longest continuous stretch                                                                                                                                                                                                                                                                                                                                                                                                                                                      |
| <b>ZLD ChIP-seq measurements</b>          | Mean, Max sliding window of: 200, 500 and 1000, longest continuous stretch                                                                                                                                                                                                                                                                                                                                                                                                                                                     |
| <b>DNA accessibility</b>                  | DNase1, DNase2                                                                                                                                                                                                                                                                                                                                                                                                                                                                                                                 |
| <b>Bi-directional RNA binding</b>         | Distance, absolute distance, maximal signal                                                                                                                                                                                                                                                                                                                                                                                                                                                                                    |
| <b>Exon/intron data</b>                   | Coding Exons Coverage, All Exons Coverage, Introns Coverage, binary indicators for whether segments contain exons, coding exons or introns                                                                                                                                                                                                                                                                                                                                                                                     |
| <b>Transcriptional data</b>               | Distance to Pol II binding peak, distance to closest transcription start site                                                                                                                                                                                                                                                                                                                                                                                                                                                  |

**Table S2. Results of genomic constructs used as validation set for prediction.** St5 expression. 1 indicates expression activity observed at stage 5, 0 indicates no expression was observed.

| Line Name | Prediction Score | FDR range | St5 expression | Arm | Rel 6 Start | Rel 6 End | Rel5 Start | Rel 5 End  |
|-----------|------------------|-----------|----------------|-----|-------------|-----------|------------|------------|
| CEP01120  | 0.99282          | 4%        | 1              | X   | 13228864    | 13230982  | 13122897   | 13125015   |
| CEP01117  | 0.99072          | 4%        | 1              | 3R  | 16864341    | 16866105  | 12690063   | 12691827   |
| CEP01127  | 0.9894           | 4%        | 1              | 2R  | 20040447    | 20042224  | 15927952   | 15929729   |
| CEP01103  | 0.98678          | 4%        | 1              | 3L  | 2384636     | 2386548   | 2384636    | 2386548    |
| CEP01124  | 0.97866          | 25%       | 1              | 3L  | 15700867    | 15702825  | 15693967   | 15695925   |
| CEP01139  | 0.97716          | 25%       | 1              | 3L  | 21008165    | 21010056  | 21001265   | 21003156   |
| CEP01143  | 0.97538          | 25%       | 1              | 3R  | 31936558    | 31938611  | 27762280   | 27764333   |
| CEP01104  | 0.9729           | 25%       | 1              | 3L  | 2879238     | 2881012   | 2879238    | 2881012    |
| CEP01102  | 0.97246          | 25%       | 1              | 2L  | 1421000     | 1422900   | 1421000    | 1422900    |
| CEP01107  | 0.97232          | 25%       | 1              | 2L  | 3078954     | 3081088   | 3078954    | 3081088    |
| CEP01137  | 0.96938          | 25%       | 1              | 2L  | 19326187    | 19328032  | 19326187   | 19328032   |
| CEP01113  | 0.96856          | 25%       | 1              | 2R  | 15734639    | 15736436  | 11622144   | 11623941   |
| CEP01125  | 0.9685           | 25%       | 1              | 3L  | 15702662    | 15704639  | 15695762   | 15697739   |
| CEP01118  | 0.96794          | 25%       | 0              | 3L  | 13076761    | 13078428  | 13069861   | 13071528   |
| CEP01133  | 0.9651           | 25%       | 1              | 2L  | 17221300    | 17223233  | 17221300   | 17223233   |
| CEP01130  | 0.93782          | 50%       | 1              | 3L  | 16630860    | 16632285  | 16623960   | 16625385   |
| CEP01110  | 0.93678          | 50%       | 1              | 3L  | 9421333     | 9423095   | 9414433    | 9416195    |
| CEP01151  | 0.93162          | 50%       | 1              | 3R  | 7043578     | 7044878   | 2,869,300  | 2,870,600  |
| CEP01123  | 0.92818          | 50%       | 0              | 2R  | 19257755    | 19259263  | 15145260   | 15146768   |
| CEP01136  | 0.92742          | 50%       | 1              | X   | 17745431    | 17746556  | 17639464   | 17640589   |
| CEP01135  | 0.92714          | 50%       | 1              | X   | 17507528    | 17509231  | 17401561   | 17403264   |
| CEP01111  | 0.9269           | 50%       | 1              | 2L  | 11343450    | 11344785  | 11343450   | 11344785   |
| CEP01116  | 0.92332          | 50%       | 1              | 3R  | 16098827    | 16100747  | 11924549   | 11926469   |
| CEP01144  | 0.92000          | 50%       | 1              | 2R  | 10077595    | 10078595  | 5,965,100  | 5,966,100  |
| CEP01150  | 0.91874          | 50%       | 1              | 3R  | 19935378    | 19936578  | 15,761,100 | 15,762,300 |
| CEP01101  | 0.9135           | 50%       | 1              | 3L  | 489700      | 491000    | 489700     | 491000     |
| CEP01109  | 0.89746          | 50%       | 1              | 2L  | 8146372     | 8147729   | 8146372    | 8147729    |
| CEP01119  | 0.8948           | 50%       | 1              | 3L  | 13113494    | 13114703  | 13106594   | 13107803   |
| CEP01105  | 0.89452          | 50%       | 0              | 3R  | 7162231     | 7163425   | 2987953    | 2989147    |
| CEP01148  | 0.89386          | 50%       | 1              | 3R  | 16859478    | 16860478  | 12,685,200 | 12,686,200 |
| CEP01121  | 0.89286          | 50%       | 1              | 3L  | 14958837    | 14959386  | 14951937   | 14952486   |
| CEP01140  | 0.88654          | 50%       | 1              | 3R  | 29764032    | 29765191  | 25589754   | 25590913   |

**Table S3. ChIP-seq scores for histone marks for each enhancer with low levels H3K27ac.**

Validated training-set enhancers with a H3K27ac peak binding lower than the median of non-enhancer segments throughout stages 4-6 (cell cycle 12-14), as is the sum of binding in cell cycles 8-14. Maximal binding during cell cycle 8, 12, 14a, 14c and their sum are shown along with the type of enhancer and the source of enhancer validation data.

|                                | H3K27ac_<br>c12 | H3K27ac_<br>c14a | H3K27ac_<br>_c14c | H3K27ac_<br>c8 | H3K27ac<br>tracks sum | Enhancer<br>type | Validation     |
|--------------------------------|-----------------|------------------|-------------------|----------------|-----------------------|------------------|----------------|
| <b>Non-enhancer<br/>Median</b> | <b>20</b>       | <b>17</b>        | <b>20</b>         | <b>14</b>      | <b>78</b>             |                  |                |
| ChIPPCRM5                      | 17              | 16               | 13                | 7              | 53                    | SDE              | Celniker group |
| PCE8533                        | 14              | 15               | 16                | 14             | 59                    | SDE              | Celniker group |
| ChIPPCRM101                    | 14              | 16               | 16                | 7              | 53                    | SDE              | Celniker group |
| VT47178                        | 10              | 7                | 11                | 22             | 50                    | SDE              | Kvon et al.    |
| PCE8520                        | 15              | 11               | 11                | 0              | 37                    | SDE              | Celniker group |
| ChIPPCRM11                     | 15              | 10               | 16                | 14             | 55                    | SDE              | Celniker group |
| VT64511                        | 12              | 13               | 19                | 14             | 58                    | SDE              | Celniker group |
| VT7078                         | 12              | 13               | 17                | 7              | 49                    | SDE              | Kvon et al.    |
| VT20119                        | 8               | 13               | 18                | 22             | 61                    | SDE              | Kvon et al.    |
| PCE8602                        | 10              | 12               | 8                 | 14             | 44                    | non-SDE          | Celniker group |
| PCE8458                        | 12              | 17               | 18                | 7              | 54                    | non-SDE          | Celniker group |
| GMR11C11                       | 17              | 11               | 16                | 14             | 58                    | non-SDE          | Celniker group |
| GMR10A07                       | 1               | 16               | 10                | 51             | 78                    | non-SDE          | Celniker group |
| VT12768                        | 14              | 16               | 16                | 22             | 68                    | non-SDE          | Kvon et al.    |
| VT14329                        | 14              | 16               | 10                | 22             | 62                    | non-SDE          | Kvon et al.    |
| VT14347                        | 14              | 16               | 15                | 7              | 52                    | non-SDE          | Kvon et al.    |
| VT14726                        | 13              | 15               | 15                | 22             | 65                    | non-SDE          | Kvon et al.    |
| VT16984                        | 14              | 12               | 13                | 14             | 53                    | non-SDE          | Kvon et al.    |
| VT19752                        | 14              | 6                | 8                 | 22             | 50                    | non-SDE          | Kvon et al.    |
| VT19895                        | 8               | 11               | 6                 | 29             | 54                    | non-SDE          | Kvon et al.    |
| VT22261                        | 13              | 13               | 19                | 14             | 59                    | non-SDE          | Kvon et al.    |
| VT23797                        | 19              | 11               | 15                | 22             | 67                    | non-SDE          | Kvon et al.    |
| VT24637                        | 8               | 12               | 14                | 14             | 48                    | non-SDE          | Kvon et al.    |
| VT25922                        | 17              | 12               | 20                | 14             | 63                    | non-SDE          | Kvon et al.    |
| VT26006                        | 20              | 16               | 16                | 14             | 66                    | non-SDE          | Kvon et al.    |
| VT26012                        | 19              | 13               | 15                | 14             | 61                    | non-SDE          | Kvon et al.    |
| VT26785                        | 9               | 15               | 20                | 14             | 58                    | non-SDE          | Kvon et al.    |
| VT27271                        | 12              | 10               | 18                | 29             | 69                    | non-SDE          | Kvon et al.    |
| VT27272                        | 10              | 10               | 13                | 7              | 40                    | non-SDE          | Kvon et al.    |
| VT3477                         | 20              | 16               | 11                | 14             | 61                    | non-SDE          | Kvon et al.    |
| VT35631                        | 0               | 0                | 0                 | 0              | 0                     | non-SDE          | Kvon et al.    |
| VT37817                        | 10              | 6                | 6                 | 36             | 58                    | non-SDE          | Kvon et al.    |
| VT38780                        | 13              | 13               | 18                | 26             | 70                    | non-SDE          | Kvon et al.    |
| VT39428                        | 4               | 2                | 5                 | 0              | 11                    | non-SDE          | Kvon et al.    |
| VT40566                        | 12              | 12               | 15                | 36             | 75                    | non-SDE          | Kvon et al.    |
| VT40770                        | 19              | 13               | 18                | 14             | 64                    | non-SDE          | Kvon et al.    |
| VT41895                        | 14              | 17               | 16                | 14             | 61                    | non-SDE          | Kvon et al.    |
| VT45119                        | 8               | 10               | 18                | 7              | 43                    | non-SDE          | Kvon et al.    |
| VT45642                        | 17              | 8                | 15                | 7              | 47                    | non-SDE          | Kvon et al.    |
| VT45997                        | 3               | 15               | 15                | 14             | 47                    | non-SDE          | Kvon et al.    |
| VT48569                        | 15              | 8                | 20                | 22             | 65                    | non-SDE          | Kvon et al.    |

**Table S3, cont.**

|                                | H3K27ac_<br>c12 | H3K27ac_<br>c14a | H3K27ac_<br>_c14c | H3K27ac_<br>c8 | H3K27ac<br>tracks sum | Enhancer<br>type | Validation     |
|--------------------------------|-----------------|------------------|-------------------|----------------|-----------------------|------------------|----------------|
| <b>Non-enhancer<br/>Median</b> | <b>20</b>       | <b>17</b>        | <b>20</b>         | <b>14</b>      | <b>78</b>             |                  |                |
| VT48827                        | 13              | 16               | 15                | 7              | 51                    | non-SDE          | Kvon et al.    |
| VT4905                         | 13              | 10               | 18                | 14             | 55                    | non-SDE          | Kvon et al.    |
| VT4990                         | 8               | 15               | 13                | 22             | 58                    | non-SDE          | Kvon et al.    |
| VT50230                        | 18              | 11               | 15                | 29             | 73                    | non-SDE          | Kvon et al.    |
| VT50245                        | 16              | 17               | 20                | 22             | 75                    | non-SDE          | Kvon et al.    |
| VT56665                        | 4               | 15               | 14                | 7              | 40                    | non-SDE          | Kvon et al.    |
| VT57294                        | 18              | 10               | 6                 | 14             | 48                    | non-SDE          | Kvon et al.    |
| VT57365                        | 9               | 8                | 5                 | 14             | 36                    | non-SDE          | Kvon et al.    |
| VT57463                        | 6               | 15               | 15                | 14             | 50                    | non-SDE          | Kvon et al.    |
| VT58480                        | 15              | 10               | 12                | 29             | 66                    | non-SDE          | Kvon et al.    |
| VT58863                        | 17              | 13               | 16                | 14             | 60                    | non-SDE          | Kvon et al.    |
| VT60196                        | 14              | 8                | 11                | 14             | 47                    | non-SDE          | Kvon et al.    |
| VT63194                        | 10              | 16               | 16                | 22             | 64                    | non-SDE          | Kvon et al.    |
| VT9682                         | 6               | 11               | 16                | 7              | 40                    | non-SDE          | Kvon et al.    |
| VT28267                        | 20              | 15               | 3                 | 36             | 74                    | non-SDE          | Kvon et al.    |
| VT59438                        | 18              | 17               | 18                | 7              | 60                    | non-SDE          | Kvon et al.    |
| VT56875                        | 18              | 15               | 13                | 7              | 53                    | non-SDE          | Kvon et al.    |
| VT56791                        | 17              | 11               | 13                | 22             | 63                    | non-SDE          | Kvon et al.    |
| VT64886                        | 10              | 17               | 18                | 7              | 52                    | non-SDE          | Kvon et al.    |
| GMR25F01                       | 8               | 8                | 5                 | 14             | 35                    | non-SDE          | Celniker group |
| VT57075                        | 9               | 8                | 6                 | 7              | 30                    | non-SDE          | Kvon et al.    |

**Additional Dataset S1 (separate file)**

Complete list of genomic segments used in this work, by categories.

**Additional Dataset S2 (separate file)**

Complete list of genome-wide enhancer predictions.
